# Supplementary material for: Kurarinone from Sophora Flavescens Roots Triggers ATF4 Activation and Cytostatic Effects Through PERK Phosphorylation
Source: PubMed Central journal article supplement (PMC6749437; doi:10.3390/molecules24173110), 2019-08-27
Supplement: molecules-24-03110-s001.pdf [file molecules-24-03110-s001.pdf]

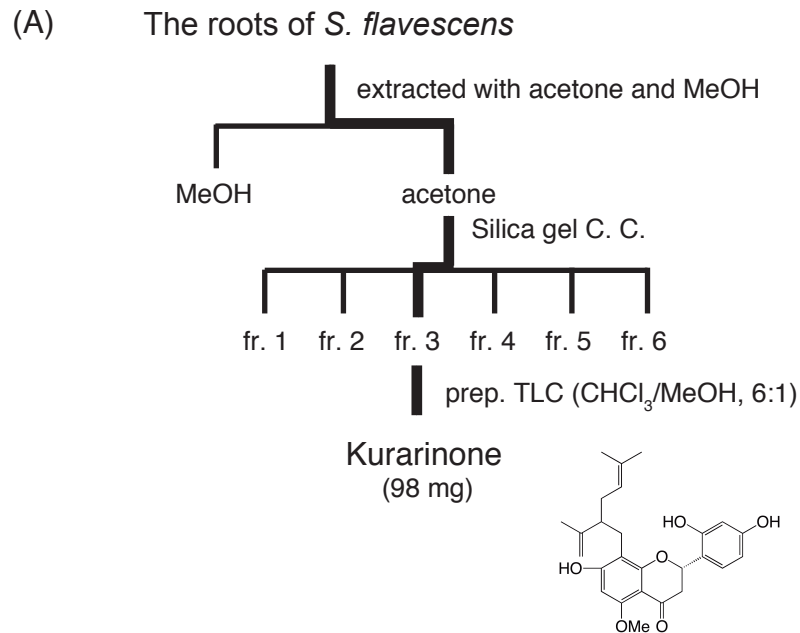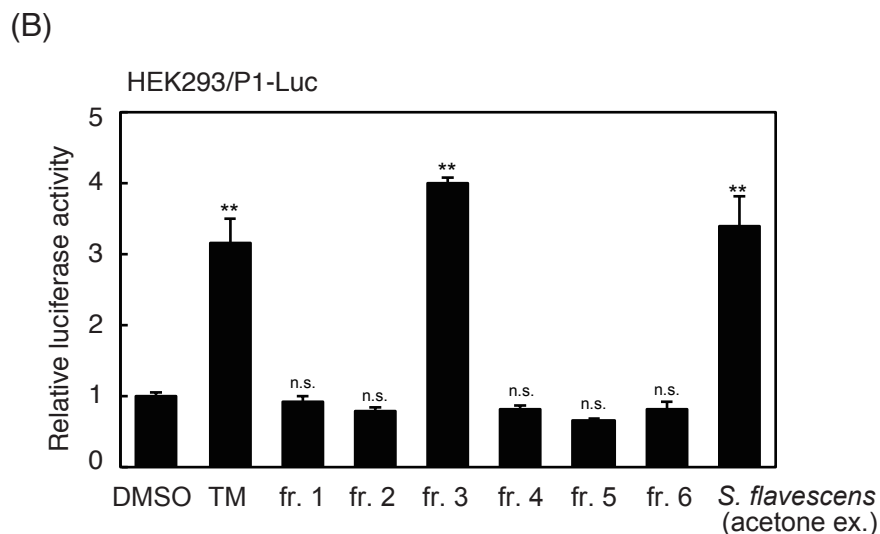

Figure S1. Acetone extract of *S. flavescens* roots activated the promoter activity of TRB3.

(A) Activity-guided fractionation of the acetone extract and isolation of active principles.

(B) HEK293/P1-Luc reporter cells were treated with 0.6  $\mu\text{g/ml}$  of tunicamycin (TM) or 100  $\mu\text{g/ml}$  of the indicated fraction (fr.) of *S. flavescens* roots. After 24 h, luciferase activities in cell lysates were measured. Data are represented as the mean fold activation  $\pm$  S.D. ( $n = 3$ ). Significant differences are indicated as  $**p < 0.01$ . n.s.: not significant.

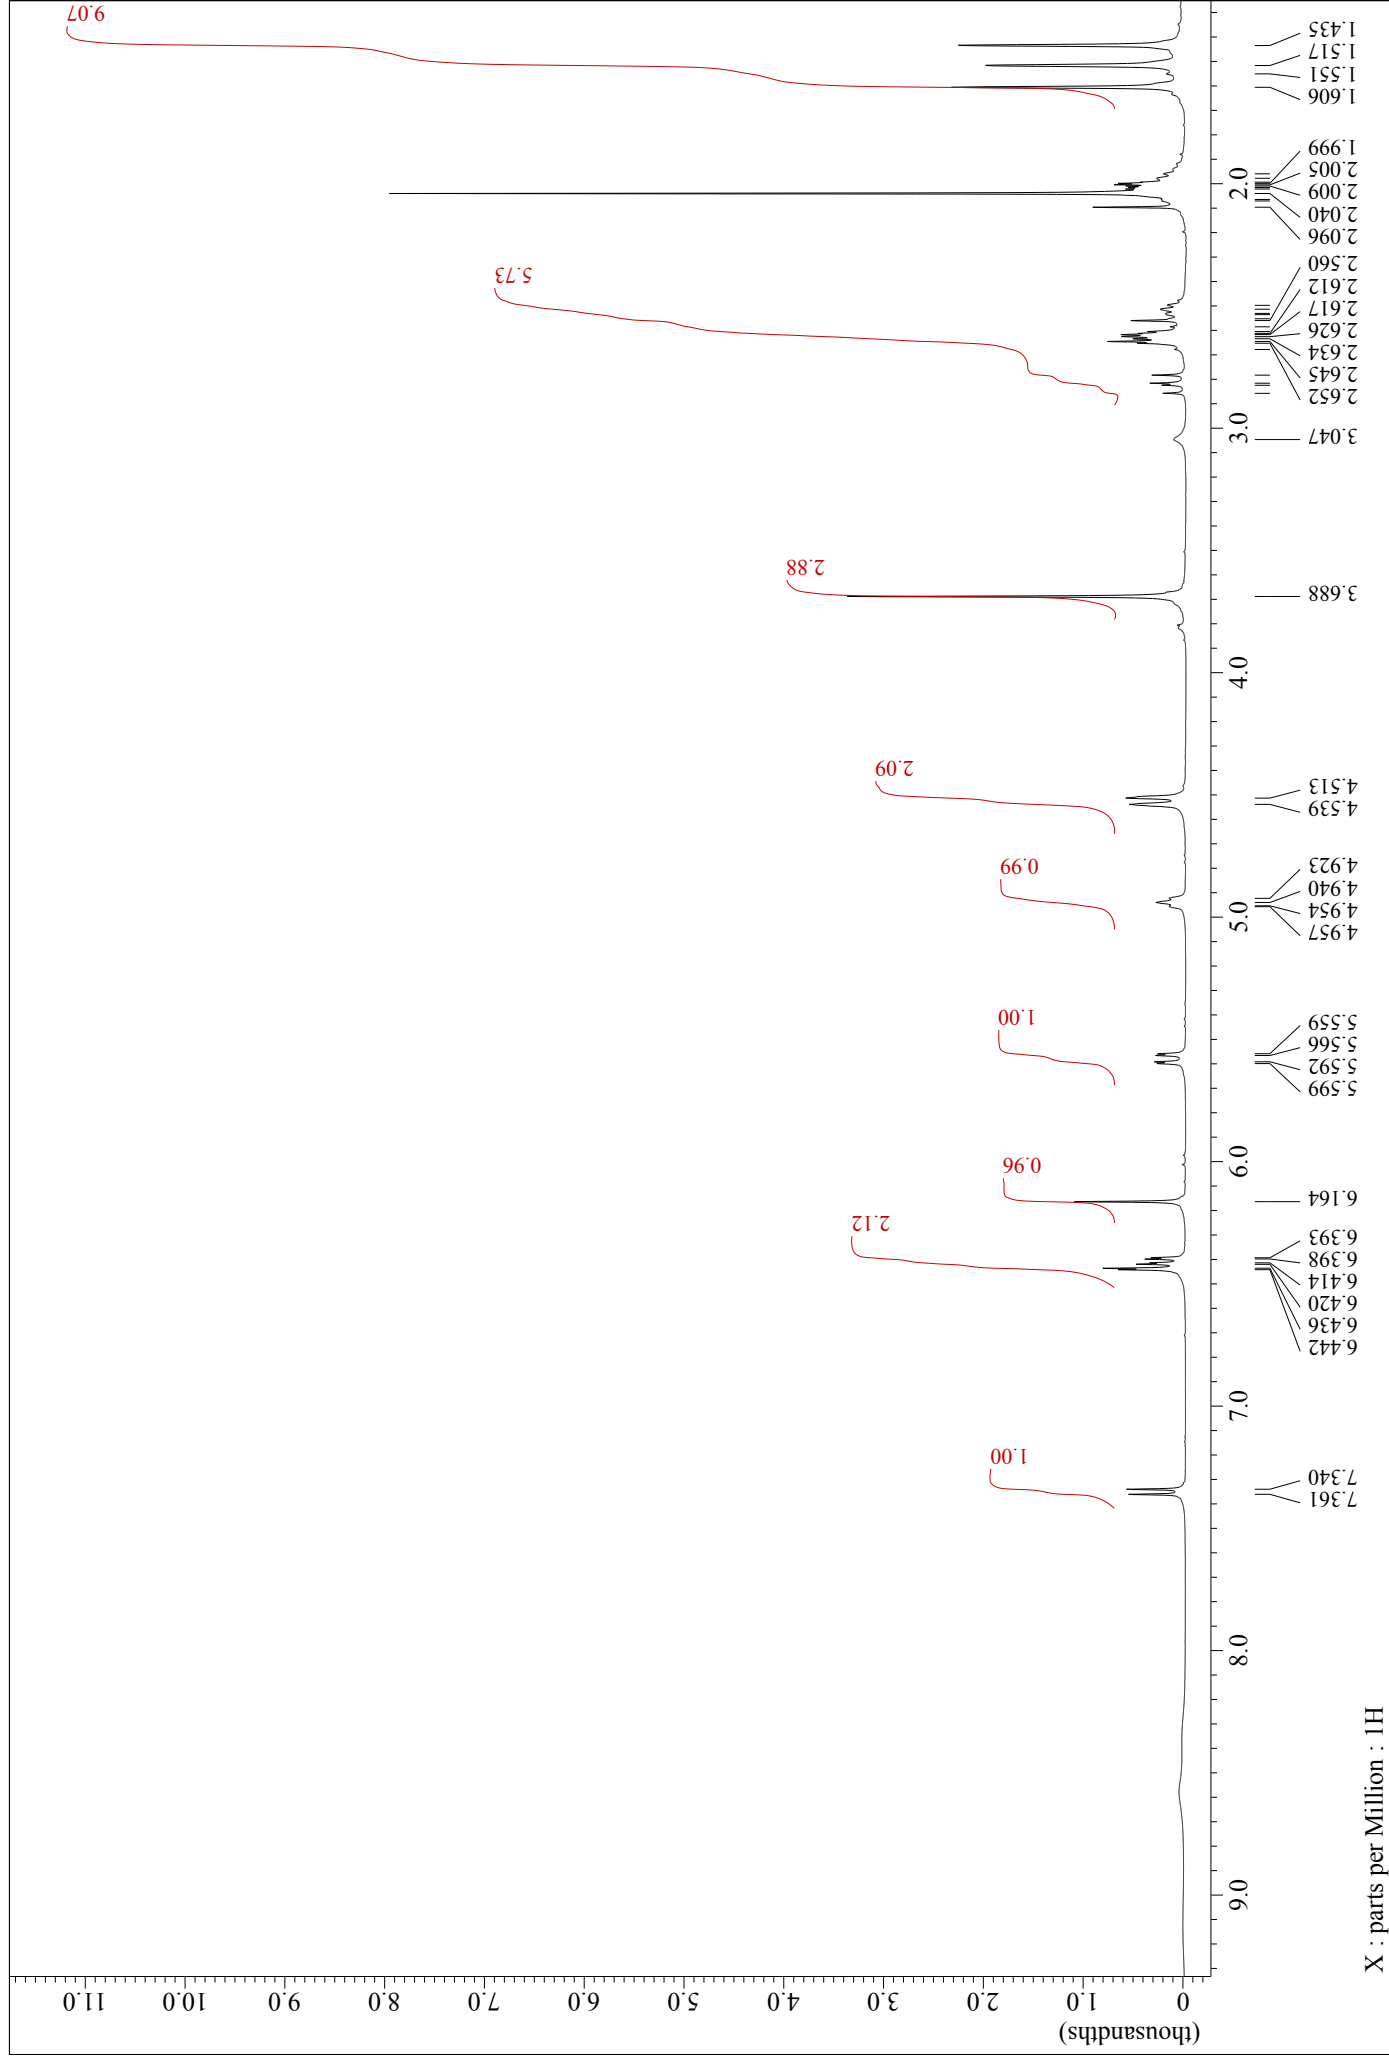

Figure S2.  $^1\text{H}$  NMR spectrum (400 MHz,  $\text{acetone-}d_6$ ) of kurarinone.
